# Supplementary material
Source: PubMed Central journal article supplement (PMC5131832)
Supplement: ry152472suppa1.pdf [file ry152472suppa1.pdf]

**Table E1. Standardized Mortality Ratios for Total and Specific Causes of Death**

| Parameter                                                                                                                                                                                          | Radiologists  |                   | Psychiatrists |                   |
|----------------------------------------------------------------------------------------------------------------------------------------------------------------------------------------------------|---------------|-------------------|---------------|-------------------|
|                                                                                                                                                                                                    | No. of Deaths | Observed/Expected | No. of Deaths | Observed/Expected |
| All causes of death                                                                                                                                                                                | 4468          | 0.47              | 8339          | 0.52              |
| All malignant neoplasms (140–208, 238.6)/(C00-C97)                                                                                                                                                 | 1398          | 0.52              | 2457          | 0.54              |
| Lip, oral cavity, pharynx (140–149)/(C00-C14)                                                                                                                                                      | 30            | 0.54              | 41            | 0.45              |
| Digestive organs (150–159)/(C15-C26)                                                                                                                                                               | 393           | 0.61              | 696           | 0.64              |
| Esophagus (150/C15)                                                                                                                                                                                | 37            | 0.43              | 54            | 0.39              |
| Stomach (151/C16)                                                                                                                                                                                  | 41            | 0.56              | 66            | 0.53              |
| Colon excluding rectum (153)/(C18)                                                                                                                                                                 | 144           | 0.66              | 243           | 0.65              |
| Rectum and rectosigmoid junction (154)/(C19-C21)                                                                                                                                                   | 20            | 0.44              | 35            | 0.46              |
| Liver and intrahepatic bile duct (155)/(C22)                                                                                                                                                       | 38            | 0.56              | 65            | 0.59              |
| Pancreas (157/C25)                                                                                                                                                                                 | 102           | 0.76              | 204           | 0.9               |
| Respiratory and intrathoracic organs (160–165)/(C30–39)                                                                                                                                            | 275           | 0.29              | 454           | 0.28              |
| Lung and bronchus (162)/(C34)                                                                                                                                                                      | 265           | 0.29              | 443           | 0.29              |
| Bone (170)/(C40-C41)                                                                                                                                                                               | 3             | 0.61              | 5             | 0.62              |
| Skin (172–173)/(C43–44)                                                                                                                                                                            | 54            | 0.93              | 78            | 0.83              |
| Melanoma (172)/(C43)                                                                                                                                                                               | 48            | 1.1               | 59            | 0.84              |
| Other nonepithelial skin (173)/(C44)                                                                                                                                                               | 6             | 0.42              | 19            | 0.81              |
| Soft tissue (171)/(C45-C49)                                                                                                                                                                        | 23            | 0.91              | 36            | 0.87              |
| Breast (174–175)/C50)                                                                                                                                                                              | 21            | 0.1               | 64            | 0.77              |
| Genitourinary organs (179–189)/(C51-C68)                                                                                                                                                           | 249           | 0.67              | 456           | 0.70              |
| Prostate (185)/(C61)                                                                                                                                                                               | 148           | 0.69              | 304           | 0.80              |
| Urinary bladder (188)/(C67)                                                                                                                                                                        | 42            | 0.67              | 53            | 0.49              |
| Kidney and renal pelvis (189)/(C64-C65)                                                                                                                                                            | 44            | 0.65              | 68            | 0.61              |
| Brain and central nervous system (including benign) (191–192, 225)/(C70-C72, D32-D33, D35.2-D35.3, D42-D43)                                                                                        | 59            | 0.78              | 130           | 1.06              |
| Brain and central nervous system (191–192)(C70-C72)                                                                                                                                                | 52            | 0.77              | 119           | 1.09              |
| Thyroid (193)/(C73)                                                                                                                                                                                | 9             | 1.87              | 7             | 0.87              |
| All lymphoid and hematopoietic (200.0–200.8, 201.0–201.9, 202.0–202.2, 202.8–202.9, 203.0–203.2, 204.0–204.2, 204.8–204.9, 208.0–208.2, 208.8–208.9)/(C81-C88, C90.0, C90.2, C91.0–C91.9, C95-C96) | 215           | 0.88              | 319           | 0.77              |
| Total leukemia (204.0, 204.1, 204.2, 204.8, 204.9, 205.0, 205.1, 206.0, 207.0, 207.2, 208.0, 208.1, 208.2, 208.8, 208.9; C91.0–91.4, C92.0, C92.1, C92.4, C92.5, C93.0, C94.0, C94.2, C95)         | 84            | 0.86              | 117           | 0.71              |
| Leukemia excluding chronic lymphocytic leukemia (204.0, 205.0–205.1, 206.0, 207.0, 207.2)/(C91.0, C92.0–C92.1, C92.4–C92.5, C93.0, C94.0, C94.2)                                                   | 47            | 0.82              | 60            | 0.63              |
| Total lymphoma (200.0–200.8, 201.0–201.9, 202.0–202.2, 202.8)/(C8182-C88);                                                                                                                         | 101           | 0.93              | 156           | 0.87              |
| All myeloid (205.0, 205.3, 205.8–205.9, 206.0–206.2, 206.8–206.9, 207.0–207.2, 238.7, 285.0)/(C92.0–C92.5, C92.7, C92.9, C93.0–C93.2, C93.7, C93.9, C94.0–C94.5, D45–D47.3)                        | 59            | 0.84              | 75            | 0.64              |
| Acute myeloid leukemia and myelodysplastic syndrome (MDS) (205.0, 206.0–206.2, 207.0, 207.2, 238.7, 285.0)/(C92.0, C92.4–C92.5, C93.0, C94.0, C94.2, D46)*                                         | 44            | 0.84              | 48            | 0.54              |

|                                                                                                                                               |      |      |      |      |
|-----------------------------------------------------------------------------------------------------------------------------------------------|------|------|------|------|
| Acute myeloid and monocytic leukemia (205.0, 206.0–206.2, 207.0, 207.2)/(C92.0, C92.4-C92.5, C93.0, C94.0, C94.2)                             | 33   | 0.79 | 38   | 0.54 |
| MDS (238.7, 285.0)/(D46)                                                                                                                      | 11   | 1.06 | 10   | 0.56 |
| Myeloproliferative disorders (202.6, 205.1–205.2, 238.4–238.5)/(C92.1-C92.2, D45, D47.0-D47.1, D47.3)                                         | 13   | 0.9  | 21   | 0.87 |
| Chronic myeloid leukemia (205.1)/(C92.1)                                                                                                      | 10   | 0.97 | 16   | 0.93 |
| Other myeloid leukemia (205.3, 205.8–205.9)/(C92.3, C92.7, C92.9, C94.1)                                                                      | 2    | 0.93 | 6    | 1.64 |
| Other myeloid malignancies (206.8–206.9, 207.1)/(C93.1-C93.2, C93.7, C93.9, C94.2-C94.5)                                                      | 0    | 0    | 0    | 0    |
| All lymphoid (200.0–200.8, 201.0–201.9, 202.0–202.2, 202.8–202.9, 203.0–203.2, 204.0–204.2, 204.8–204.9)/(C81-C88, C90.0, C90.2, C91.0-C91.9) | 162  | 0.88 | 259  | 0.84 |
| NHL (200.0–200.8, 202.0–202.2, 202.8–202.9)/(C82-C88)                                                                                         | 95   | 0.94 | 151  | 0.9  |
| Chronic lymphocytic leukemia (204.1, 204.2)/(C91.1-C91.3)                                                                                     | 17   | 0.86 | 26   | 0.77 |
| Acute lymphocytic leukemia (204.0)/(C91.0)                                                                                                    | 4    | 0.80 | 6    | 0.75 |
| Other lymphoid leukemia (204.8–204.9)/(C91.4-C91.9)                                                                                           | 0    | 0    | 3    | 1.09 |
| Multiple myeloma (203.0–203.2)/(C90.0, C90.2)                                                                                                 | 40   | 0.84 | 65   | 0.8  |
| Hodgkin lymphoma (201.0–201.9)/(C81)                                                                                                          | 6    | 0.71 | 8    | 0.59 |
| Other leukemias of unspecified cell type (208.0–208.2, 208.8–208.9)/(C95)                                                                     | 18   | 0.8  | 21   | 0.55 |
| Other and unspecified malignant neoplasms of lymphoid, hematopoietic and related tissue (202.5, 202.8–202.9)/(C96)                            | 0    | 0    | 0    | 0    |
| Infectious diseases (001–139)/(A00-B99)                                                                                                       | 91   | 0.32 | 294  | 0.68 |
| Human immunodeficiency virus (042–044)/(B20-B24)                                                                                              | 40   | 0.32 | 169  | 0.97 |
| Septicemia (038)/(A40-A41)                                                                                                                    | 15   | 0.17 | 49   | 0.32 |
| Diseases of blood-forming tissue (280–289)/(D50-D89)                                                                                          | 21   | 0.65 | 34   | 0.62 |
| Aplastic anemia (284.8, 284.9)/(D61.3, D61.8, D61.9)                                                                                          | 5    | 1.66 | 4    | 0.77 |
| All endocrine disorders (240–279)/(E00-E90)                                                                                                   | 122  | 0.38 | 228  | 0.43 |
| Disorders of the thyroid gland (240–246)/(E00-E90)                                                                                            | 0    | 0    | 2    | 0.52 |
| Diabetes mellitus (250)/(E10-E14)                                                                                                             | 93   | 0.37 | 158  | 0.38 |
| All mental and behavioral disorders (290–319)/(F00-F99)                                                                                       | 60   | 0.51 | 101  | 0.53 |
| Neurologic and mental conditions (320–389)/(G00-G99)                                                                                          | 185  | 0.91 | 312  | 0.9  |
| Alzheimers (331.0)/(G30)                                                                                                                      | 51   | 0.91 | 98   | 0.97 |
| Other degenerative diseases of the nervous system (331.1–337.9)/(G31-G32)                                                                     | 53   | 1.50 | 68   | 1.08 |
| All circulatory diseases (390–459)/(I00-I99)                                                                                                  | 1653 | 0.45 | 3093 | 0.49 |
| Hypertension without heart disease (401)/(I10)                                                                                                | 7    | 0.29 | 22   | 0.54 |
| Ischemic heart disease (410–414)/(I20-I25)                                                                                                    | 981  | 0.45 | 1848 | 0.50 |
| Other diseases of heart (420–429)/(I30-I52)                                                                                                   | 250  | 0.39 | 513  | 0.46 |
| Cerebrovascular diseases (430–438)/(I60-I69)                                                                                                  | 242  | 0.52 | 411  | 0.50 |
| Atherosclerosis (440)/(I70)                                                                                                                   | 15   | 0.40 | 35   | 0.51 |
| Aortic aneurysm and dissection (441)/(I71)                                                                                                    | 44   | 0.53 | 88   | 0.61 |
| All diseases of the respiratory system (460–519)/(J00-J99)                                                                                    | 240  | 0.30 | 499  | 0.36 |
| Pneumonia and influenza (480–487)/(J10-J18)                                                                                                   | 72   | 0.36 | 172  | 0.49 |
| Chronic obstructive pulmonary disease and allied conditions (490–496)/(J40-J47)                                                               | 107  | 0.24 | 209  | 0.26 |
| All gastrointestinal diseases (520–579)/(K00-K93)                                                                                             | 139  | 0.35 | 222  | 0.35 |
| Chronic liver disease and cirrhosis (571)/(K70-K77)                                                                                           | 62   | 0.29 | 80   | 0.24 |
| All genitourinary diseases (580–629)/(N00-N99)                                                                                                | 65   | 0.42 | 120  | 0.45 |
| Nephritis, nephrotic syndrome/glomerular disease (580–589)/(N00-N08)                                                                          | 20   | 0.45 | 46   | 0.57 |

|                                                                       |     |      |     |      |
|-----------------------------------------------------------------------|-----|------|-----|------|
| Accidents and adverse effects (800-949)/(V01-X59, Y85-Y86)            | 316 | 0.49 | 660 | 0.67 |
| Suicide and self-inflicted injury (E950-E959)/(U03, X60-X84, Y87.0)   | 170 | 0.88 | 394 | 1.38 |
| Homicide and legal intervention (E960-E969)/(U01-U02, X85-Y09, Y87.1) | 13  | 0.14 | 41  | 0.31 |

Note.—Except where noted, data are for men and women combined.

\* Includes all malignant, benign, and uncertain behavior.

**Table E2. RRs and 95% CIs for Deaths from All Causes, All Cancers, Site-specific Cancers, and Circulatory Diseases in All Exposed Radiologists Compared with Male Psychiatrists Who Were Confirmed Alive or Deceased: Sensitivity Analysis**

| Causes of Death (ICD 9 and 10 Codes)                                                                                                                                                        | <1940    |                    | 1940–1959 |                   | 1960–1979 |                   | 1980+   |                   | P Value for Trend | Overall   |                   |
|---------------------------------------------------------------------------------------------------------------------------------------------------------------------------------------------|----------|--------------------|-----------|-------------------|-----------|-------------------|---------|-------------------|-------------------|-----------|-------------------|
|                                                                                                                                                                                             | Deaths*  | RR <sup>†</sup>    | Deaths*   | RR <sup>†</sup>   | Deaths*   | RR <sup>†</sup>   | Deaths* | RR <sup>†</sup>   |                   | Deaths*   | RR <sup>†</sup>   |
| All causes of death                                                                                                                                                                         | 712/1415 | 0.94 (0.86, 1.03)  | 2427/4389 | 0.95 (0.91, 1.00) | 973/1689  | 0.82 (0.76, 0.89) | 148/322 | 0.63 (0.51, 0.76) | <.001             | 4260/7815 | 0.91 (0.87, 0.94) |
| All malignant neoplasms (140–208, 238.6)/(C00-C97)                                                                                                                                          | 190/321  | 1.10 (0.92, 1.32)  | 745/1330  | 0.96 (0.88, 1.05) | 337/528   | 0.90 (0.79, 1.04) | 34/57   | 0.86 (0.56, 1.34) | .37               | 1306/2236 | 0.96 (0.90, 1.03) |
| Brain and central nervous system (including benign) (191–192, 225)/(C70-C72, D32-D33, D35.2-D35.3, D42-D43)                                                                                 | 1/11     | 0.17 (0.02, 1.29)  | 26/59     | 0.75 (0.47, 1.20) | 24/37     | 0.86 (0.52, 1.45) | 6/12    | 0.67 (0.25, 1.79) | .33               | 57/119    | 0.73 (0.53, 1.01) |
| Brain and central nervous system (191–192)(C70-C72)                                                                                                                                         | 1/9      | 0.20 (0.02, 1.58)  | 23/54     | 0.73 (0.45, 1.19) | 22/34     | 0.85 (0.50, 1.46) | 6/11    | 0.71 (0.26, 1.94) | .49               | 52/108    | 0.73 (0.52, 1.02) |
| Total leukemia (204, 0, 204.1, 204.2, 204.8, 204.9, 205.0, 205.1, 206.0, 207.0, 207.2, 208.0, 208.1, 208.2, 208.8, 208.9; C91.0–91.4, C92.0, C92.1, C92.4, C92.5, C93.0, C94.0, C94.2, C95) | 11/11    | 1.87 (0.82, 4.32)  | 44/59     | 1.28 (0.86, 1.90) | 20/33     | 0.85 (0.49, 1.49) | 2/2     | 1.19 (0.16, 9.03) | .45               | 77/105    | 1.19 (0.88, 1.60) |
| Leukemia excluding CLL (204.0, 205.0–205.1, 206.0, 207.0, 207.2)/(C91.0, C92.0-C92.1, C92.4-C92.5, C93.0, C94.0, C94.2)                                                                     | 5/3      | 3.21 (0.77, 13.45) | 23/32     | 1.24 (0.72, 2.11) | 14/16     | 1.20 (0.58, 2.45) | 2/1     | 1.92 (0.17, 22.0) | >.50              | 44/52     | 1.34 (0.90, 2.01) |
| Acute myeloid leukemia and myelodysplastic syndrome (MDS) (205.0, 206.0, 2, 207.0, 207.2, 238.7, 285.0)/(C92.0, C92.4-C92.5, C93.0, C94.0, C94.2, D46) <sup>b</sup>                         | 4/2      | 3.66 (0.67, 20.02) | 22/28     | 1.35 (0.77, 2.37) | 11/9      | 1.69 (0.70, 4.09) | 3/0     | NA                | .24               | 40/39     | 1.64 (1.05, 2.56) |
| All circulatory diseases (390–459)/(I00-I99)                                                                                                                                                | 364/756  | 0.90 (0.80, 1.02)  | 944/1719  | 0.95 (0.88, 1.03) | 290/452   | 0.96 (0.83, 1.12) | 22/52   | 0.62 (0.37, 1.03) | .34               | 1620/2979 | 0.94 (0.88, 1.00) |
| Ischemic heart disease (410–414)/(I20-I25)                                                                                                                                                  | 211/456  | 0.86 (0.73, 1.02)  | 563/1044  | 0.94 (0.84, 1.04) | 176/271   | 0.97 (0.80, 1.17) | 12/27   | 0.67 (0.34, 1.33) | >.50              | 962/1798  | 0.92 (0.85, 0.99) |
| Cerebrovascular diseases (430–438)/(I60-I69)                                                                                                                                                | 77/101   | 1.46 (1.08, 1.96)  | 133/219   | 1.06 (0.85, 1.31) | 27/60     | 0.71 (0.45, 1.13) | 2/6     | 0.43 (0.09, 2.16) | .04               | 239/386   | 1.09 (0.93, 1.28) |

\* Data are numbers of radiologists/numbers of psychiatrists.

† Stratified according to year of attained age (30–34, 35–39, 40–44, 45–49, 50–54, 55–59, 60–64, 65–69, 70–74, 75–79, 80+), year of birth (1894–1903, 1904–1913, 1914–1923, 1924–1933, 1934–1943, 1944–1953, 1954–1963, 1964–1973, 1974–1983), and year of medical school graduation (< 1940, 1940–59, 1960–79, 1980+). Numbers in parentheses are 95% CIs. NA = not applicable.
